# Supplementary material for: The chromatin structuring protein HMGA2 influences human subtelomere stability and cancer chemosensitivity
Source: PubMed Central journal article supplement (PMC6505889; doi:10.1371/journal.pone.0215696), 2019-05-08

**A**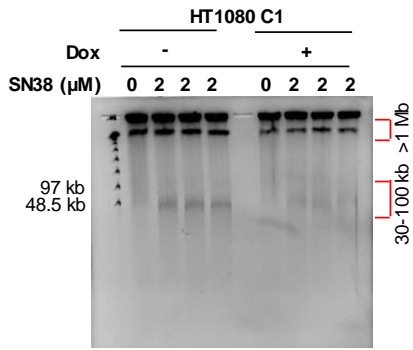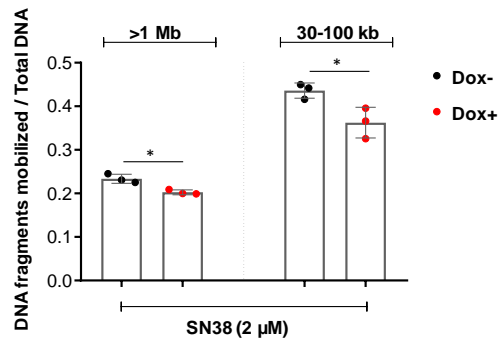**B**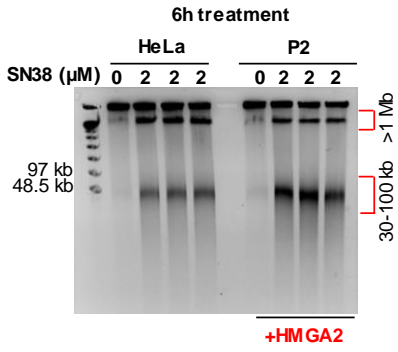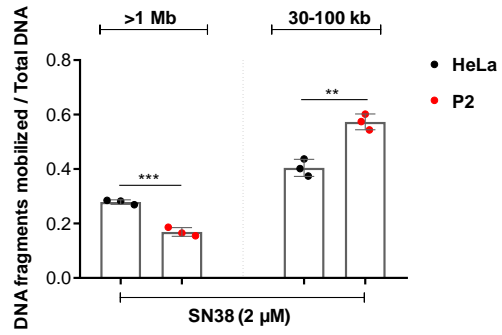

Supplement: pone.0215696.s002.pdf [file pone.0215696.s002.pdf]
