# Supplementary material for: The chromatin structuring protein HMGA2 influences human subtelomere stability and cancer chemosensitivity
Source: PubMed Central journal article supplement (PMC6505889; doi:10.1371/journal.pone.0215696), 2019-05-08
Supplement: pone.0215696.s005.pdf [file pone.0215696.s005.pdf]

**A**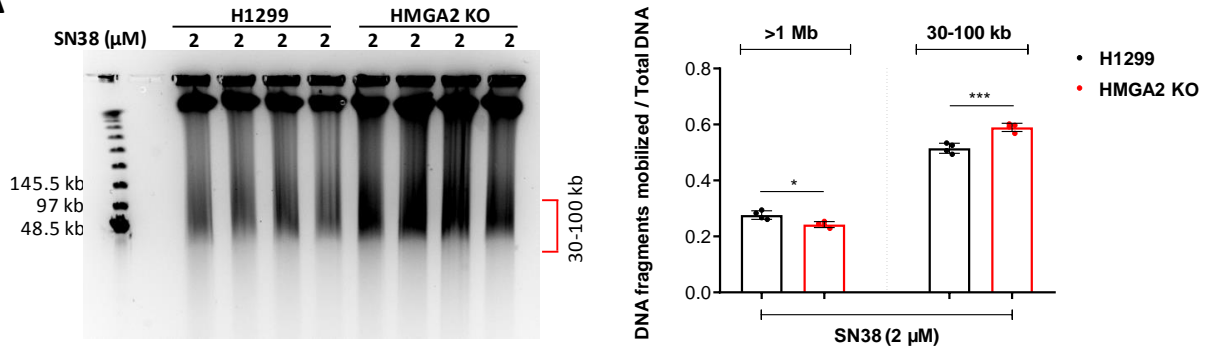**B**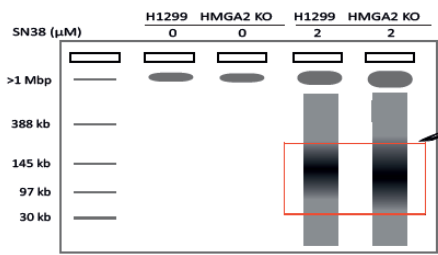**C**

↓ DNA extraction, sequencing and alignment to GRCh38

GRCh38 chr17

Centromeres

**D**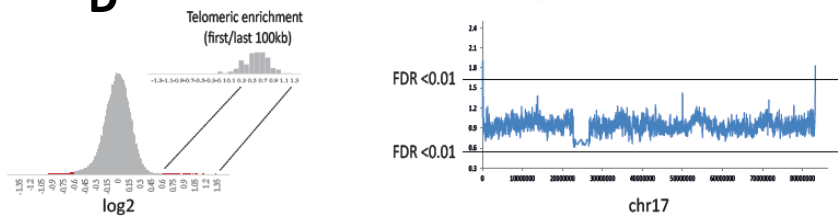

H1299 enrichment distribution upon SN38 treatment

H1299 enrichment over 20kb bins
